# Supplementary material for: Predicting β-turns and their types using predicted backbone dihedral angles and secondary structures
Source: Springer Nature journal article supplement (doi:10.1186/1471-2105-11-407), 2010-07-31
Supplement: 12859_2010_3864_MOESM2_ESM.pdf [file 12859_2010_3864_MOESM2_ESM.pdf]

Input Sequence

E D V G A P P D H L W V H Q E G I Y R D E Y Q R T W

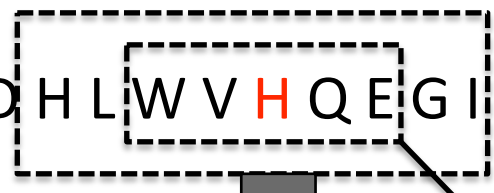

PSI-BLAST

PSSM

|    |    |    |    |    |    |    |    |    |    |    |    |    |    |    |    |    |    |    |    |
|----|----|----|----|----|----|----|----|----|----|----|----|----|----|----|----|----|----|----|----|
| A  | R  | N  | D  | C  | Q  | E  | G  | H  | I  | L  | K  | M  | F  | P  | S  | T  | W  | Y  | V  |
| 4  | -2 | -1 | -2 | -1 | -1 | -1 | 0  | -2 | -2 | -2 | -1 | -1 | -2 | -1 | 2  | 0  | -3 | -2 | 0  |
| -1 | 2  | -1 | -2 | -3 | -1 | -2 | 4  | -2 | -3 | -2 | -1 | -2 | 2  | -3 | 1  | -1 | -2 | -1 | -3 |
| 1  | -1 | -1 | 3  | -3 | 1  | 3  | 0  | -1 | -2 | -2 | -1 | -2 | -3 | -2 | 0  | -1 | -3 | -3 | 0  |
| -1 | 1  | 0  | 2  | -3 | 1  | 2  | -2 | 4  | -2 | -3 | 0  | -2 | -3 | 3  | -1 | -1 | -3 | -1 | -2 |
| 0  | -2 | -2 | -3 | -1 | -2 | -2 | -3 | -3 | 1  | 2  | -2 | 2  | -1 | -2 | -1 | 2  | -3 | -2 | 2  |
| 0  | -3 | -1 | -2 | -3 | -2 | -2 | 5  | -3 | -4 | -4 | -2 | -3 | -4 | 4  | -1 | 1  | -3 | -3 | -3 |
| 2  | -2 | -2 | 1  | -2 | -2 | -1 | -2 | -2 | -1 | 0  | -2 | -1 | 1  | 3  | 0  | 0  | -2 | -1 | 0  |
| -2 | -2 | -2 | -2 | -3 | -1 | -2 | -3 | 6  | -2 | 0  | -2 | -2 | -3 | 6  | -1 | -2 | -4 | -1 | -3 |
| -2 | -3 | -3 | -3 | -4 | -2 | -2 | -3 | -3 | -4 | -4 | -2 | -4 | -5 | 8  | -2 | -2 | -5 | -4 | -3 |
| -2 | 0  | 1  | 5  | 2  | -1 | 0  | -1 | 1  | -1 | -2 | -1 | -2 | -3 | -2 | -1 | 0  | -4 | -2 | 1  |
| -2 | 5  | -1 | -3 | -4 | 0  | -1 | -3 | 5  | -3 | -2 | 0  | -2 | 2  | -3 | -2 | -2 | -1 | 3  | -3 |
| -2 | -3 | -4 | -5 | -2 | -3 | -4 | -5 | -4 | 1  | 5  | -3 | 1  | 0  | -4 | -3 | -2 | -2 | -2 | 0  |
| -3 | -4 | -5 | -5 | -3 | -3 | -4 | -4 | -4 | -1 | -2 | -4 | -2 | 0  | -4 | -4 | -3 | 11 | 1  | 2  |

Linear Scaling

Transform the 9x20 matrix into a 180 dimension vector

Transform into (180+15+35) dimension vector

DISSPred

Secondary structure & dihedral prediction

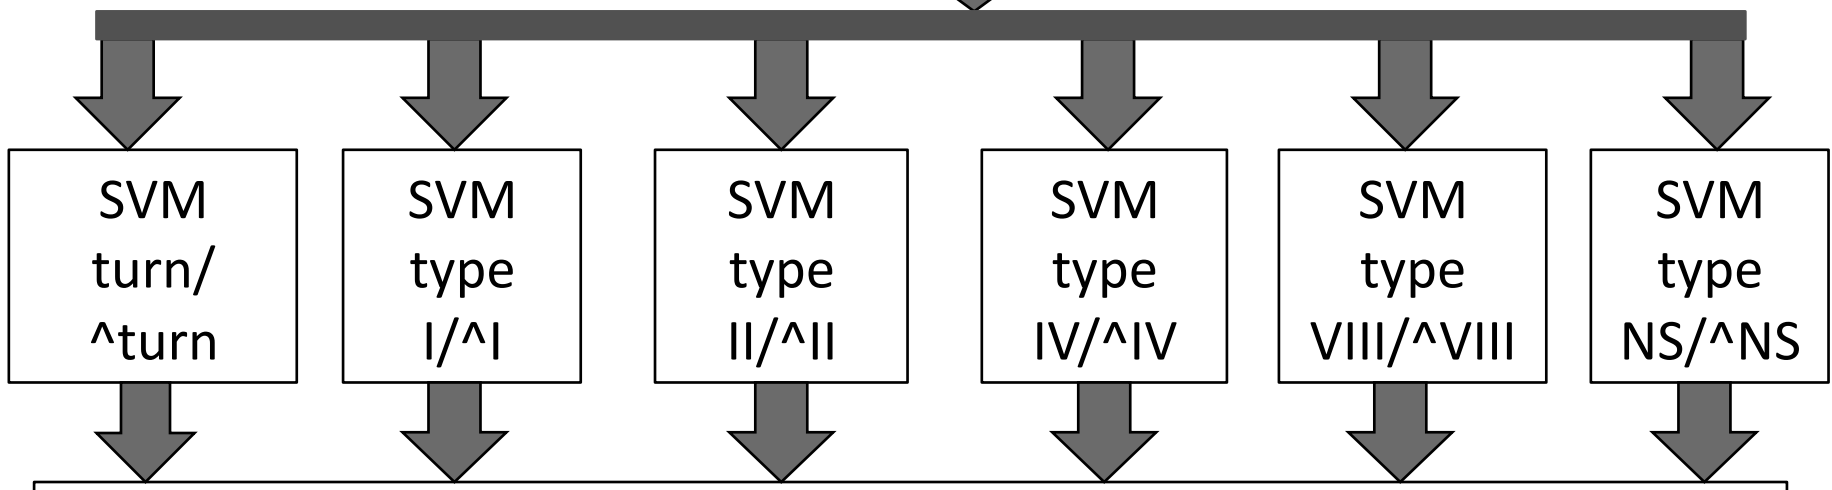

Filtering

turn or non-turn    I or non-I    II or non-II    IV or non-IV    VIII or non-VIII    NS or non-NS
