# Supplementary material for: Predicting β-turns and their types using predicted backbone dihedral angles and secondary structures
Source: Springer Nature journal article supplement (doi:10.1186/1471-2105-11-407), 2010-07-31

a) turn/non-turn

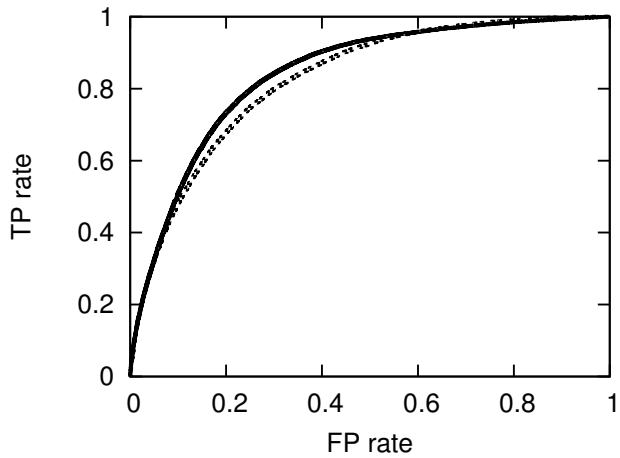

b) type I

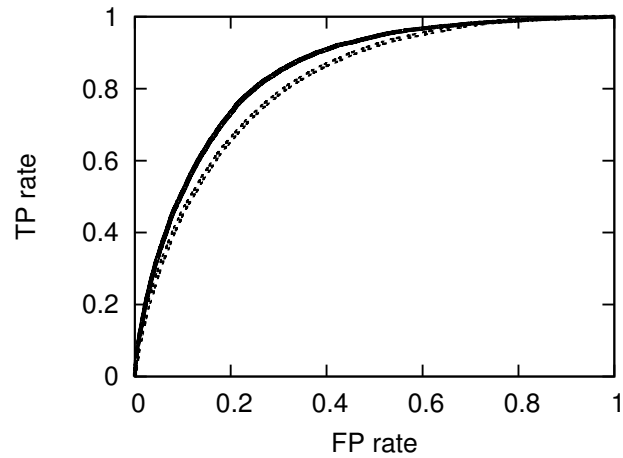

c) type II

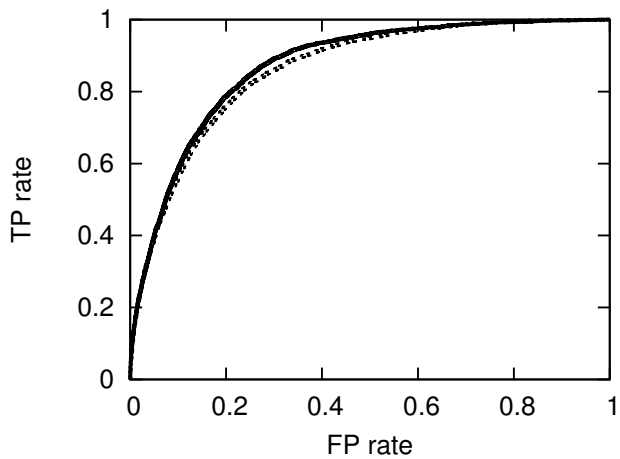

d) type IV

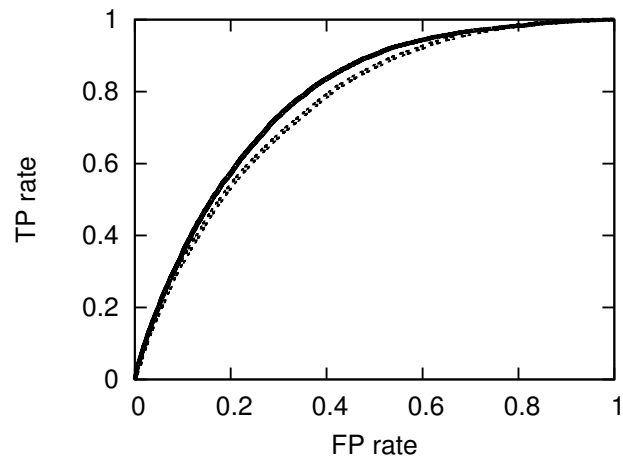

e) type VIII

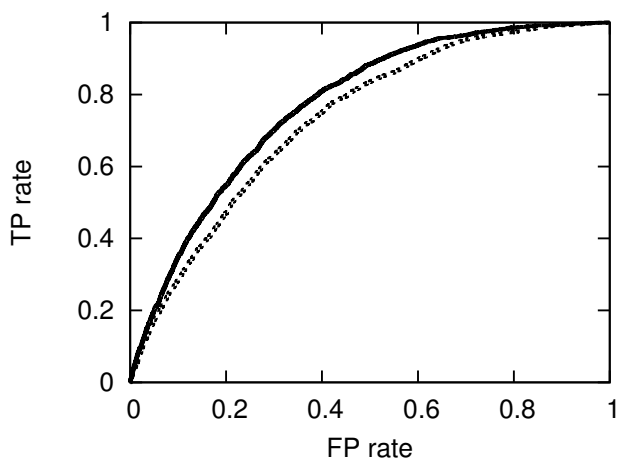

f) type NS

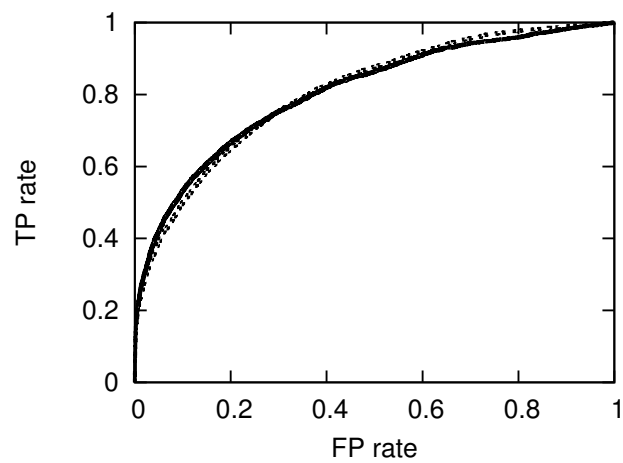

Supplement: 12859_2010_3864_MOESM3_ESM.pdf [file 12859_2010_3864_MOESM3_ESM.pdf]
