# Supplementary material for: Predicting β-turns and their types using predicted backbone dihedral angles and secondary structures
Source: Springer Nature journal article supplement (doi:10.1186/1471-2105-11-407), 2010-07-31
Supplement: 12859_2010_3864_MOESM4_ESM.pdf [file 12859_2010_3864_MOESM4_ESM.pdf]

| AA | No. | Loc | I | II | IV | VIII | NS |
|----|-----|-----|---|----|----|------|----|
| .  |     |     |   |    |    |      |    |
| .  |     |     |   |    |    |      |    |
| L  | 23  | 0   | 0 | 0  | 0  | 0    | 0  |
| K  | 24  | 0   | 0 | 0  | 0  | 0    | 0  |
| G  | 25  | 0   | 0 | 0  | 0  | 0    | 0  |
| L  | 26  | 0   | 0 | 0  | 0  | 0    | 0  |
| V  | 27  | 0   | 0 | 0  | 0  | 0    | 0  |
| P  | 28  | 1   | 1 | 0  | 0  | 1    | 0  |
| L  | 29  | 1   | 1 | 0  | 0  | 1    | 0  |
| G  | 30  | 1   | 1 | 0  | 0  | 1    | 0  |
| P  | 31  | 1   | 1 | 0  | 0  | 1    | 0  |
| D  | 32  | 1   | 1 | 0  | 0  | 1    | 0  |
| S  | 33  | 1   | 1 | 0  | 0  | 1    | 0  |
| S  | 34  | 1   | 1 | 0  | 0  | 1    | 0  |
| R  | 35  | 0   | 0 | 0  | 0  | 1    | 0  |
| H  | 36  | 0   | 0 | 0  | 0  | 0    | 0  |
| T  | 37  | 0   | 0 | 0  | 0  | 0    | 0  |
| T  | 38  | 0   | 0 | 0  | 0  | 0    | 0  |
| .  |     |     |   |    |    |      |    |
| .  |     |     |   |    |    |      |    |
